# Supplementary material for: A humidity-enhanced silicon-based semiconductor tribovoltaic direct-current nanogenerator
Source: Royal Society of Chemistry journal article supplement (doi:10.1039/d2ta07637c), 2022-01-01
Supplement: d2ta07637c1.pdf [file d2ta07637c1.pdf]

## Supporting Information

### Humidity Enhanced Silicon-based Semiconductor Tribovoltaic Direct-Current Nanogenerator

Zhaozheng Wang,<sup>‡ab</sup> Likun Gong,<sup>‡ab</sup> Sicheng Dong,<sup>‡ab</sup> Beibei Fan,<sup>ac</sup> Yuan Feng,<sup>ac</sup> Zhi Zhang,<sup>ab</sup>  
and Chi Zhang <sup>\*abc</sup>

<sup>a</sup> CAS Center for Excellence in Nanoscience, Beijing Key Laboratory of Micro-nano Energy and Sensor, Beijing Institute of Nanoenergy and Nanosystems, Chinese Academy of Sciences, Beijing 100083, P. R. China

<sup>b</sup> School of Nanoscience and Technology, University of Chinese Academy of Sciences, Beijing 100049, P. R. China

<sup>c</sup> Center on Nanoenergy Research, School of Physical Science and Technology, Guangxi University, Nanning 530004, China

\* Corresponding author.

E-mail addresses: czhang@binn.cas.cn (C. Zhang).

<sup>‡</sup>These authors contributed equally to this work.

The PDF file includes:  
Supplementary Materials

Table S1. Default parameters of the experiment setup.

Table S2. Comparison of the charge density with that in the previous humidity-resistive TENGs.

Figure S1. The humidity control and electrical output measuring platform.

Figure S2. Impedance-matching curve of TVNG based on n-Si/Cu in RH 30% humidity.

Figure S3. Impedance-matching curve of TVNG based on n-Si/Cu in RH 90% humidity.

Figure S4. Open-circuit voltage of TVNG based on n-Si/C between RH 30% and RH 90% humidity.

Figure S5. Short-circuit current of TVNG based on n-Si/C between RH 30% and RH 90% humidity.

Figure S6. Power density of the TVNG based on n-Si/C between RH 30% and RH 90% humidity.

Related Reference [1-6] in Supplementary Materials.

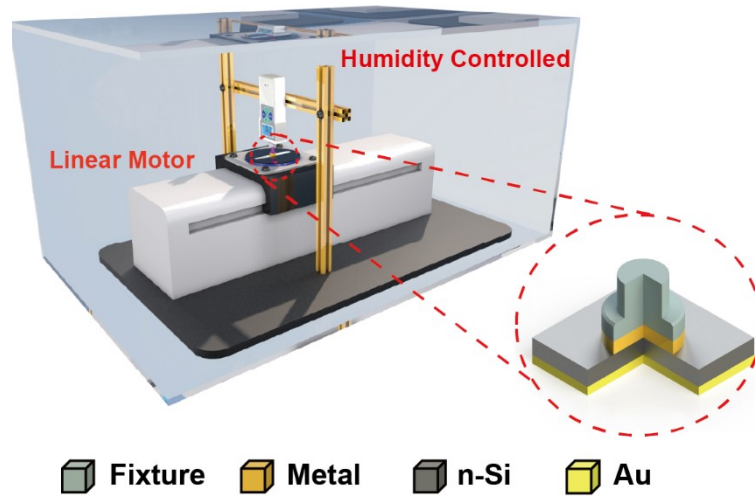

Figure S1. The humidity control and electrical output measuring platform.

Table S1. Default parameters of the experiment setup

| Materials pair             | Sliding velocity | Sliding block area | Pressure | Resistivity                      |
|----------------------------|------------------|--------------------|----------|----------------------------------|
| Cu(C)/n-type doped silicon | 10 cm/s          | 2 cm <sup>2</sup>  | 5 N      | 0.1-0.5 $\Omega \cdot \text{cm}$ |

Table S2. Comparison of the charge density with that in the previous humidity-resistive TENGs<sup>[1-6]</sup>

| Materials    | AC/DC     | Charge density(mC/m <sup>2</sup> ) | Humidity (RH) | Internal Resistance (k $\Omega$ ) | Ref.             |
|--------------|-----------|------------------------------------|---------------|-----------------------------------|------------------|
| Wood+FEP     | AC        | 0.01                               | 75%           | -                                 | [1]              |
| FZCT+PTFE    | AC        | 0.09                               | 80%           | 1000                              | [2]              |
| PTFE+Fur     | AC        | 0.1152                             | 90%           | 18000                             | [3]              |
| PDMS+Cu      | AC        | 0.175                              | 90%           | 10000                             | [4]              |
| PVDF+PVA     | AC        | 0.244                              | 90%           | -                                 | [5]              |
| Cu+PVC/      | DC        | 2.97                               | 90%           | -                                 | [6]              |
| <b>Cu+Si</b> | <b>DC</b> | <b>12.6</b>                        | <b>90%</b>    | <b>50</b>                         | <b>This work</b> |

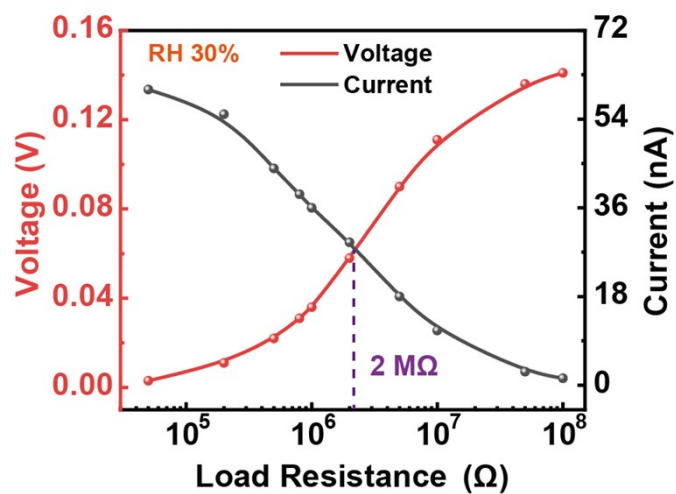

Figure S2. Impedance-matching curve of TVNG  
based on n-Si/Cu in RH 30% humidity.

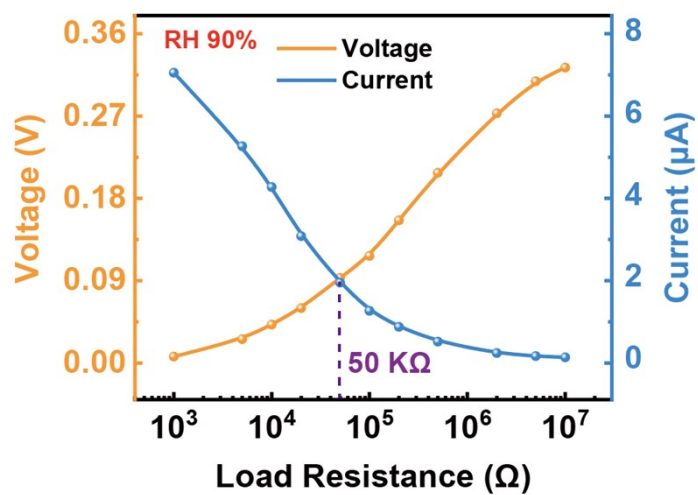

Figure S3. Impedance-matching curve of TVNG  
based on n-Si/Cu in RH 90% humidity.

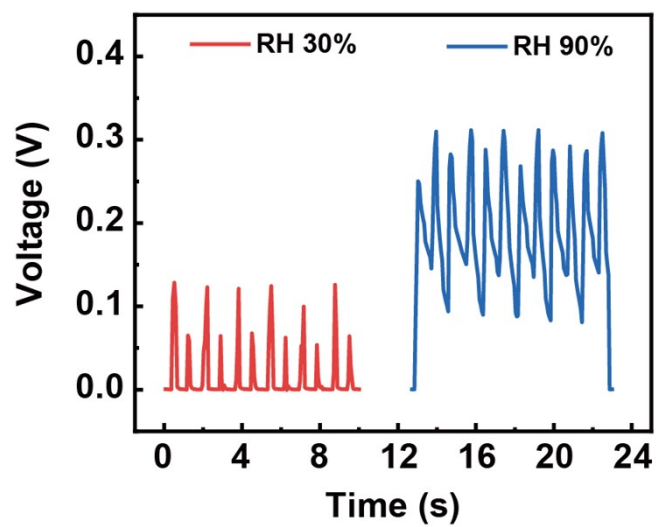

Figure S4. Open-circuit voltage of TVNG based on n-Si/C between RH 30% and RH 90% humidity.

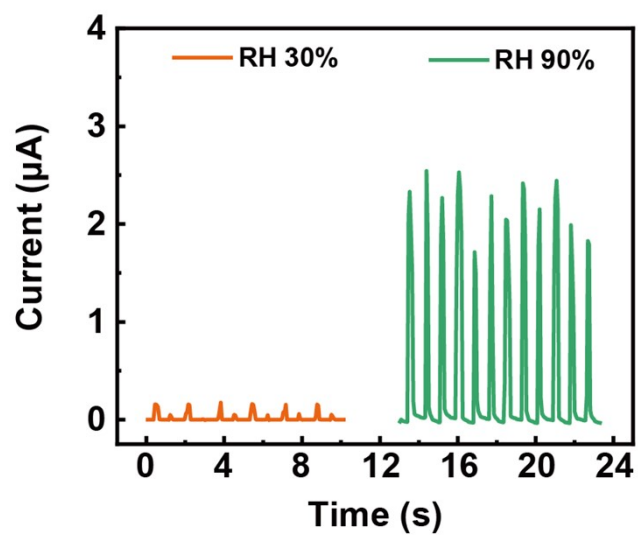

Figure S5. Short-circuit current of TVNG based on n-Si/C between RH 30% and RH 90% humidity.

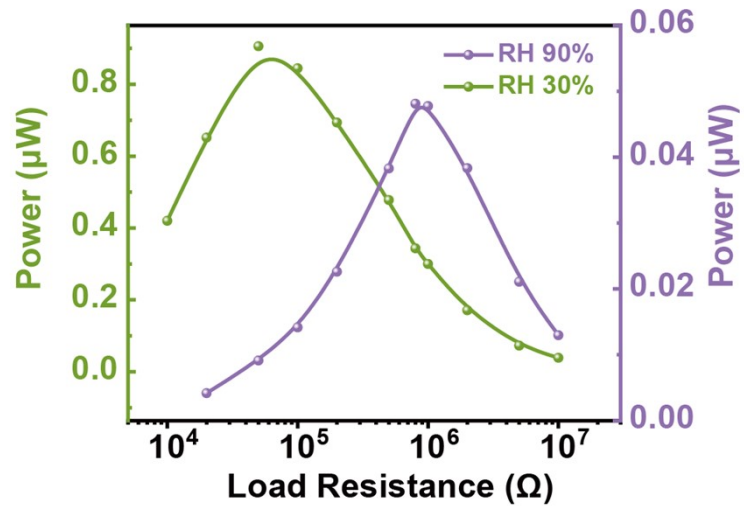

Figure S6. Power density of the TVNG based on n-Si/C between RH 30% and RH 90% humidity.

## References

- [1] C. Cai, J. Mo, Y. Lu, N. Zhang, Z. Wu, S. Wang, S. Nie, Nano Energy, 83 (2021).
- [2] N. Jayababu, D. Kim, Nano Energy, 82 (2021).
- [3] P. Chen, J. An, S. Shu, R. Cheng, J. Nie, T. Jiang, Z.L. Wang, Adv. Energy. Mater, 11 (2021).
- [4] R. Wen, J. Guo, A. Yu, J. Zhai, Z.L. Wang, Adv. Funct. Mater, 29 (2019).
- [5] D. Liu, J. Liu, M. Yang, N. Cui, H. Wang, L. Gu, L. Wang, Y. Qin, Nano Energy, 88 (2021).
- [6] L. Liu, Z. Zhao, Y. Li, X. Li, D. Liu, S. Li, Y. Gao, L. Zhou, J. Wang, Z.L. Wang, Small, (2022) e2201402.
